# Supplementary material for: The precursor for nerve growth factor (proNGF) is not a serum or biopsy-rinse biomarker for thyroid cancer diagnosis
Source: PubMed Central journal article supplement (PMC6882079; doi:10.1186/s12902-019-0457-1), 2019-11-27

**Additional Table 1 (A-E): ProNGF ELISA Validation Experiments – Serum and Rinse**

**1A: Effect of heterophilic antibody blockers (Ab) (BL-003-1000, Biosensis, Australia) on rate of positivity of serum proNGF levels.** No changes were observed in performance of the standard curve with presence or absence of antibody blockers (data not shown).

| Disease category       | Serum samples assayed (n) | % of samples positive       |                               | p-value |
|------------------------|---------------------------|-----------------------------|-------------------------------|---------|
|                        |                           | No Heterophilic Ab blockers | With Heterophilic Ab blockers |         |
| Thyroid cancer         | 20                        | 45%                         | 15%                           | 0.04    |
| Benign thyroid disease | 20                        | 30%                         | 15%                           | 0.25    |
| No thyroid disease     | 18                        | 44%                         | 6%                            | 0.006   |

**1B: Spike and Recovery Experiments.** 4 serum samples were assayed before and after a 2.5ng/mL spike (50ng/mL following adjustment for dilution) of recombinant proNGF (Biosensis, Australia) at 1:20 dilution, in the presence of Heterophilic Antibody Blockers (BL-003-1000).

| Sample      | ProNGF (ng/mL) |            | % recovery of spike |
|-------------|----------------|------------|---------------------|
|             | Pre-spike      | Post-spike |                     |
| Sample A    | 2.7            | 66.7       | 128%                |
| Sample B    | 0.0            | 47.8       | 96%                 |
| Sample C    | 0.1            | 41.0       | 82%                 |
| Sample D    | 0.0            | 40.1       | 80%                 |
| <b>Mean</b> |                |            | <b>96%</b>          |

**1C: Inter-plate Quality Control Samples** A quality-control solution (QC) was prepared by spiking 1:20 diluted proNGF-negative serum with 1.61ng/mL (32.15ng/mL after correction for dilution) recombinant proNGF with Heterophilic Antibody Blockers. Aliquots of the QC sample were included on each ELISA plate. Plate numbers reflect two different batches of ELISA plates.

| Plate            | 1.1  | 1.2  | 1.3  | 1.4  | 1.5  | 1.6  | 2.1  | 2.2  | 2.3  | 2.4  | 2.5  | Mean (SD)         |
|------------------|------|------|------|------|------|------|------|------|------|------|------|-------------------|
| proNGF (ng/mL)   | 39.9 | 31.9 | 34.5 | 41.4 | 41.1 | 29.3 | 20.1 | 29.0 | 29.5 | 18.6 | 32.2 | <b>31.6 ± 7.3</b> |
| Percent Recovery | 124% | 99%  | 107% | 129% | 128% | 91%  | 63%  | 90%  | 92%  | 58%  | 100% | <b>98 ± 22%</b>   |

For the biopsy rinse, a similar QC solution was prepared by spiking 1.6ng/mL recombinant proNGF into phosphate buffered saline with the addition of protease inhibitors and heterophilic antibody blockers (38µg/mL). Aliquots of the QC sample were included on each ELISA plate. Plate number represent different batches.

| Plate            | 1.5  | 1.6  | 1.8  | 3.1  | 3.2  | 4.1  | 4.2  | Mean (SD)          |
|------------------|------|------|------|------|------|------|------|--------------------|
| proNGF (ng/mL)   | 2.03 | 1.53 | 1.77 | 2.27 | 2.41 | 1.56 | 1.55 | <b>1.87 ± 0.34</b> |
| Percent Recovery | 127% | 96%  | 111% | 142% | 151% | 98%  | 97%  | <b>117 ± 20%</b>   |

**1D: Linearity of Dilution** 3 serum samples positive for endogenous proNGF were assayed in serial dilution using Assay Diluent A (Biosensis, Australia) and heterophilic antibody blockers (BL-003-1000, Biosensis, Australia). The measured concentration at 1:20 dilution was defined as 100%. Reasonable linearity of dilution was observed. The zero values observed correspond to expected values below the limit of detection.

| Sample   | Endogenous ProNGF (ng/mL), corrected for dilution |             |            |            |
|----------|---------------------------------------------------|-------------|------------|------------|
|          | 1:10                                              | 1:20        | 1:40       | 1:80       |
| Sample A | 18.9 (109%)                                       | 17.3 (100%) | 10.4 (60%) | 14.6 (84%) |
| Sample B | 2.6 (106%)                                        | 2.4 (100%)  | 0          | 0          |
| Sample C | 13.5 (124%)                                       | 10.9 (100%) | 6.7 (62%)  | 0          |

**1E: Linearity of Dilution of Biopsy Rinse Diluent**

In addition to the spike and recovery experiments performed above, a 1 in 2 dilution series from 5ng/mL was prepared as the standard curve for biopsy rinse specimens using the same phosphate-buffered saline with the addition of protease inhibitors and heterophilic antibody blockers that was used to prepare the biopsy rinse specimens. 4 parameter logistic regression curves are shown below for the first three ELISA plates, showing excellent linearity of dilution.

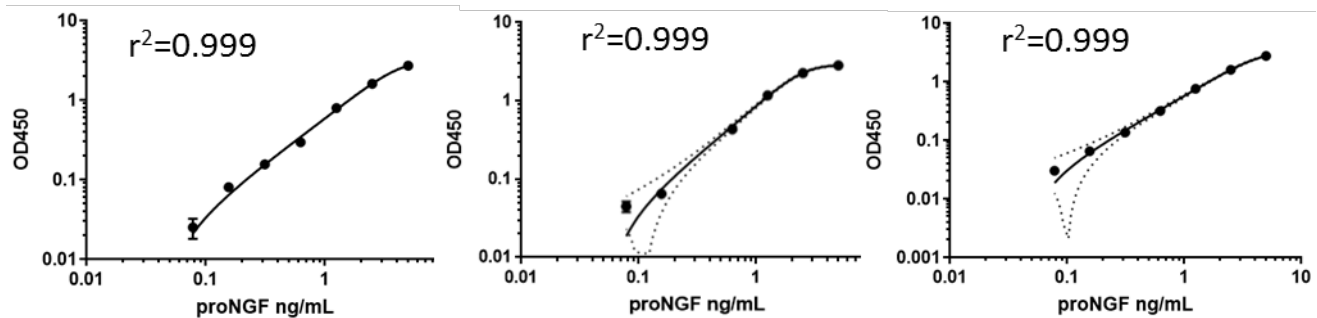

Supplement: 12902_2019_457_MOESM1_ESM.pdf [file 12902_2019_457_MOESM1_ESM.pdf]
