# Supplementary material for: The precursor for nerve growth factor (proNGF) is not a serum or biopsy-rinse biomarker for thyroid cancer diagnosis
Source: PubMed Central journal article supplement (PMC6882079; doi:10.1186/s12902-019-0457-1), 2019-11-27
Supplement: 12902_2019_457_MOESM2_ESM.pdf [file 12902_2019_457_MOESM2_ESM.pdf]

**Additional Table 2:** Individual patient characteristics for cases with detectable serum proNGF.

| CASE  | AGE   | SEX | PRIMARY<br>(SECONDARY)<br>DIAGNOSIS | REASON FOR<br>INVESTIGATION | SERUM PRONGF<br>(ng/mL) |         | TSH<br>(mIU/L) | BASIS OF<br>DIAGNOSIS |
|-------|-------|-----|-------------------------------------|-----------------------------|-------------------------|---------|----------------|-----------------------|
|       |       |     |                                     |                             | INITIAL                 | POST-OT |                |                       |
| 10087 | 51-60 | F   | Graves'                             | Treatment of GD             | 8.7                     | 4.3     | <0.01          | Histopathology        |
| 10125 | 21-30 | F   | Graves'                             | Treatment of GD             | 4.3                     | 2.8     | <0.01          | Histopathology        |
| 10140 | 31-40 | M   | Graves'                             | Treatment of GD             | 12.9                    | 11.8    | <0.01          | Histopathology        |
| 10148 | 31-40 | F   | Graves'                             | Treatment of GD             | 1.6                     | 2.3     | <0.01          | Histopathology        |
| 10166 | 21-30 | F   | Graves'                             | Treatment of GD             | 5.4                     | 4.6     | <0.01          | Histopathology        |
| 10139 | 21-30 | M   | Graves'                             | Treatment of GD             | 1.0                     | .       | 0.01           | Histopathology        |
| 10318 | 61-70 | F   | Toxic MNG                           | Hyperthyroid                | 12.6                    | .       | 0.14           | Histopathology        |
| 10056 | 81-90 | F   | PTC                                 | Recurrence                  | 6                       | .       | <0.01          | Histopathology        |
| 10208 | 21-30 | F   | PTC (8mm, 5mm)                      | Treatment of GD             | 2.2                     | .       | <0.01          | Histopathology        |
| 10276 | 31-40 | F   | PTC (21mm)                          | Suspicious nodule           | 6.4                     | .       | 0.6            | Histopathology        |
| 10101 | 81-90 | F   | PTC (15mm) (FA)                     | Suspicious nodule           | 9.3                     | 1.8     | 0.77           | Histopathology        |
| 10105 | 51-60 | M   | PTC (5mm) (MNG)                     | Compression                 | 5.6                     | 3.2     | 5.88           | Histopathology        |
| 10124 | 41-50 | M   | HCC (35mm) (FA)                     | Suspicious nodule           | 7.6                     | 2.3     | 1.37           | Histopathology        |
| 10062 | 41-50 | F   | FA                                  | Nodule                      | 8                       | .       | 1.2            | Histopathology        |
| 10463 | 61-70 | F   | FA                                  | Nodule                      | 14.7                    | .       | 1.6            | Biopsy + USS          |
| 10173 | 71-80 | F   | MNG                                 | Compression                 | 1.3                     | .       | 0.47           | Histopathology        |
| 10117 | 31-40 | F   | MNG                                 | Compression                 | 6.8                     | 1.8     | 0.4            | Histopathology        |
| 10410 | 51-60 | F   | MNG                                 | Compression                 | 2.9                     | .       | 1.3            | Histopathology        |
| 10164 | 41-50 | F   | MNG                                 | Compression                 | 5.8                     | 5.9     | 1.34           | Histopathology        |
| 10340 | 41-50 | M   | MNG                                 | Nodule                      | 3.4                     | .       | 1.66           | Biopsy + USS          |
| 10116 | 51-60 | M   | MNG                                 | Compression                 | 3.1                     | 0.7     | 2.7            | Histopathology        |
| 10465 | 41-50 | F   | MNG                                 | Nodule                      | 4.3                     | .       | 1.2            | Biopsy + USS          |
| 10005 | 31-40 | F   | Benign nodule                       | Nodule                      | 5.1                     | .       | 0.5            | Biopsy + USS          |
| 10458 | 51-60 | F   | Benign nodule                       | Nodule                      | 3.5                     | .       | 1.3            | Biopsy + USS          |
| 10274 | 31-40 | M   | Benign nodule                       | Nodule                      | 1.4                     | .       | 1.32           | Biopsy + USS          |
| 10368 | 61-70 | F   | Benign nodule                       | Nodule                      | 1.3                     | .       | 2.1            | Biopsy + USS          |
| 10424 | 61-70 | F   | Benign nodule                       | Nodule                      | 1.2                     | .       | 2.3            | Biopsy + USS          |
| 10445 | 61-70 | F   | Normal                              | Completion HTx              | 8.7                     | .       | 0.66           | Histopathology        |

FA: Follicular adenoma. MNG: Multinodular Goitre. GD: Graves' Disease. PTC: Papillary thyroid cancer. HCC: Hurthle cell cancer. USS: Neck ultrasound. HTx: Hemithyroidectomy. Initial: Mean of 6 replicates performed over a minimum of 2 separate assays. Post-OT: post thyroidectomy sample (2-14 days). Age is presented as a range to preserve patient anonymity.
