# Supplementary material for: The precursor for nerve growth factor (proNGF) is not a serum or biopsy-rinse biomarker for thyroid cancer diagnosis
Source: PubMed Central journal article supplement (PMC6882079; doi:10.1186/s12902-019-0457-1), 2019-11-27
Supplement: 12902_2019_457_MOESM3_ESM.pdf [file 12902_2019_457_MOESM3_ESM.pdf]

**Additional Table 3:** Individual patient characteristics for cases with detectable biopsy proNGF. Age is presented as a range to preserve anonymity.

| <b>CASE</b> | <b>AGE</b><br>(years) | <b>SEX</b> | <b>TSH</b><br>(mIU/L) | <b>BIOPSY PRONGF</b><br>(ng/mL) | <b>CYTOLOGY</b><br>Bethesda Score | <b>NODULE</b><br><b>DIAGNOSIS</b> | <b>BASIS OF</b><br><b>DIAGNOSIS</b> |
|-------------|-----------------------|------------|-----------------------|---------------------------------|-----------------------------------|-----------------------------------|-------------------------------------|
| 10534       | 71-80                 | F          | 0.87                  | 0.1                             | 6                                 | Anaplastic thyroid cancer         | Biopsy and USS                      |
| 10018       | 81-90                 | F          | 2.8                   | 0.2                             | 2                                 | Follicular thyroid cancer         | Histopathology                      |
| 10280       | 71-80                 | F          | 3                     | 0.16                            | 3                                 | Follicular thyroid cancer         | Histopathology                      |
| 10343       | 51-60                 | M          | 2.37                  | 0.58                            | 4                                 | Follicular thyroid cancer         | Histopathology                      |
| 10587       | 31-40                 | M          | 1.33                  | 0.21                            | 3                                 | Follicular thyroid cancer         | Histopathology                      |
| 10060       | 81-90                 | F          | 0.86                  | 1.79                            | 2                                 | Papillary thyroid cancer          | Histopathology                      |
| 10367       | 31-40                 | F          | 1.05                  | 0.11                            | 5                                 | Papillary thyroid cancer          | Histopathology                      |
| 10564       | 41-50                 | F          | 5.2                   | 0.19                            | 4                                 | Papillary thyroid cancer          | Histopathology                      |
| 10581       | 41-50                 | F          | 0.15                  | 0.2                             | 6                                 | Papillary thyroid cancer          | Histopathology                      |
| 10589       | 51-60                 | F          | 0.7                   | 0.33                            | 5                                 | Papillary thyroid cancer          | Histopathology                      |
| 10596       | 51-60                 | F          | 0.71                  | 0.55                            | 5                                 | Papillary thyroid cancer          | Histopathology                      |
| 10544       | 61-70                 | M          | 1.4                   | 0.25                            | 6                                 | Papillary thyroid cancer          | Histopathology                      |
| 10005       | 31-40                 | F          | 0.5                   | 0.06                            | 2                                 | Benign nodule                     | Biopsy and USS                      |
| 10368       | 51-60                 | F          | 2.1                   | 0.05                            | 2                                 | Benign nodule                     | Biopsy and USS                      |
| 10483       | 51-60                 | F          | 1.12                  | 0.13                            | 2                                 | Benign nodule                     | Biopsy and USS                      |
| 10486       | 41-50                 | F          | 1.06                  | 0.15                            | 2                                 | Benign nodule                     | Biopsy and USS                      |
| 10530       | 81-90                 | F          | 1                     | 0.16                            | 2                                 | Benign nodule                     | Biopsy and USS                      |
| 10531       | 61-70                 | F          | 1.9                   | 0.15                            | 2                                 | Benign nodule                     | Biopsy and USS                      |
| 10014       | 21-30                 | M          | 1.6                   | 0.12                            | 2                                 | Benign nodule                     | Biopsy and USS                      |
| 10502       | 81-90                 | M          | 1.83                  | 0.1                             | 2                                 | Benign nodule                     | Biopsy and USS                      |
| 10334       | 41-50                 | F          | 0.63                  | 0.07                            | 2                                 | Benign nodule                     | Biopsy and USS                      |
| 10402       | 41-50                 | F          | 2.2                   | 0.15                            | 2                                 | Benign nodule                     | Biopsy and USS                      |
| 10494       | 31-40                 | F          | 1.5                   | 0.1                             | 2                                 | Benign nodule                     | Biopsy and USS                      |
| 10504       | 21-30                 | F          | .                     | 0.08                            | 2                                 | Benign nodule                     | Biopsy and USS                      |
| 10512       | 31-40                 | F          | 0.94                  | 0.06                            | 2                                 | Benign nodule                     | Biopsy and USS                      |
| 10524       | 71-80                 | F          | 0.72                  | 0.1                             | 2                                 | Benign nodule                     | Biopsy and USS                      |
| 10537       | 51-60                 | F          | 2.04                  | 0.27                            | 2                                 | Benign nodule                     | Biopsy and USS                      |

|       |       |   |      |      |   |               |                |
|-------|-------|---|------|------|---|---------------|----------------|
| 10547 | 31-40 | F | 2.9  | 0.16 | 2 | Benign nodule | Biopsy and USS |
| 10549 | 31-40 | F | 1    | 0.21 | 2 | Benign nodule | Biopsy and USS |
| 10550 | 61-70 | F | 0.6  | 0.09 | 2 | Benign nodule | Biopsy and USS |
| 10552 | 51-60 | F | 0.58 | 0.16 | 2 | Benign nodule | Biopsy and USS |
| 10553 | 71-80 | F | 1.5  | 0.32 | 2 | Benign nodule | Biopsy and USS |
| 10554 | 71-80 | F | 1.5  | 0.13 | 2 | Benign nodule | Biopsy and USS |
| 10555 | 51-60 | F | 2.86 | 0.12 | 2 | Benign nodule | Biopsy and USS |
| 10559 | 21-30 | F | 0.96 | 0.17 | 2 | Benign nodule | Biopsy and USS |
| 10560 | 41-50 | F | 2    | 0.11 | 2 | Benign nodule | Biopsy and USS |
| 10562 | 71-80 | F | 1.19 | 0.05 | 2 | Benign nodule | Biopsy and USS |
| 10565 | 51-60 | F | 2    | 0.24 | 2 | Benign nodule | Biopsy and USS |
| 10566 | 41-50 | F | 0.9  | 0.13 | 2 | Benign nodule | Biopsy and USS |
| 10569 | 71-80 | F | 2.6  | 0.21 | 2 | Benign nodule | Biopsy and USS |
| 10574 | 61-70 | F | 1.3  | 0.38 | 2 | Benign nodule | Biopsy and USS |
| 10575 | 61-70 | F | 2.1  | 0.16 | 2 | Benign nodule | Biopsy and USS |
| 10578 | 61-70 | F | 1.07 | 0.05 | 2 | Benign nodule | Biopsy and USS |
| 10558 | 31-40 | F | 0.94 | 0.13 | 2 | Benign nodule | Biopsy and USS |
| 10558 | 31-40 | F | 0.94 | 0.09 | 2 | Benign nodule | Biopsy and USS |
| 10355 | 51-60 | M | 0.57 | 0.06 | 2 | Benign nodule | Biopsy and USS |
| 10404 | 61-70 | M | 1.2  | 0.05 | 2 | Benign nodule | Biopsy and USS |
| 10462 | 61-70 | M | 1.1  | 0.13 | 2 | Benign nodule | Biopsy and USS |
| 10499 | 41-50 | M | 0.3  | 0.05 | 2 | Benign nodule | Biopsy and USS |
| 10538 | 31-40 | M | 1.35 | 0.25 | 2 | Benign nodule | Biopsy and USS |
| 10568 | 61-70 | M | 0.72 | 0.3  | 2 | Benign nodule | Biopsy and USS |
| 10572 | 61-70 | M | 0.92 | 0.05 | 2 | Benign nodule | Biopsy and USS |
| 10573 | 31-40 | M | 0.25 | 0.19 | 2 | Benign nodule | Biopsy and USS |
| 10587 | 31-40 | M | 1.33 | 0.17 | 2 | Benign nodule | Biopsy and USS |
| 10012 | 31-40 | F | 0.2  | 0.11 | 2 | Benign nodule | Histopathology |
| 10053 | 51-60 | F | 2.66 | 0.11 | 2 | Benign nodule | Histopathology |
| 10366 | 41-50 | F | 1.1  | 0.18 | 2 | Benign nodule | Histopathology |

|       |       |   |      |      |   |                         |                |
|-------|-------|---|------|------|---|-------------------------|----------------|
| 10405 | 71-80 | F | 0.35 | 0.06 | 2 | Benign nodule           | Histopathology |
| 10463 | 61-70 | F | .    | 0.09 | 3 | Benign nodule           | Histopathology |
| 10501 | 71-80 | F | 0.3  | 0.16 | 2 | Benign nodule           | Histopathology |
| 10521 | 51-60 | F | 2.04 | 0.65 | 4 | Benign nodule           | Histopathology |
| 10541 | 71-80 | M | 1.5  | 0.19 | 3 | Benign nodule           | Histopathology |
| 10423 | 11-20 | F | .    | 0.05 | 2 | Follicular adenoma      | Histopathology |
| 10543 | 51-60 | F | .    | 0.32 | 3 | Follicular adenoma      | Histopathology |
| 10576 | 31-40 | F | 1.5  | 0.38 | 3 | Follicular adenoma      | Histopathology |
| 10570 | 61-70 | M | 1.14 | 0.45 | 4 | Hurthle cell adenoma    | Biopsy and USS |
| 10308 | 41-50 | F | .    | 0.09 | 4 | Hurthle cell adenoma    | Histopathology |
| 10377 | 31-40 | F | 1.41 | 0.05 | 2 | Hurthle cell adenoma    | Histopathology |
| 10548 | 41-50 | F | 0.41 | 0.56 | 4 | Hurthle cell adenoma    | Histopathology |
| 10597 | 51-60 | F | 2.1  | 0.15 | 1 | Hurthle cell adenoma    | Histopathology |
| 10598 | 71-80 | F | 2.6  | 0.3  | 3 | Hurthle cell adenoma    | Histopathology |
| 10481 | 51-60 | F | 3.4  | 0.21 | 2 | Lymphocytic thyroiditis | Histopathology |
| 10599 | 51-60 | F | 2.1  | 0.27 | 4 | Lymphocytic thyroiditis | Histopathology |
